# Transketolase of *Staphylococcus aureus* is involved in the control of master regulators of stress response during infection

Xin Tan<sup>1,2</sup>, Elodie Ramond<sup>1,2</sup>, Anne Jamet<sup>1,2</sup>, Baptiste Decaux-Tramoni<sup>1,2</sup>, Marion Dupuis<sup>1,2</sup>, Daniel Euphrasie<sup>1,2</sup>, Fabiola Tros<sup>1,2</sup>, Ivan Nemazanyy<sup>1,2,3</sup>, Jason Ziveri<sup>1,2</sup>, Xavier Nassif<sup>1,2</sup>, Alain Charbit<sup>1,2</sup> \* and Mathieu Coureuil<sup>1,2</sup> \*

<sup>1</sup> Université Paris Descartes, Sorbonne Paris Cité, Bâtiment Leriche, Paris, France

<sup>2</sup> INSERM U1151 - CNRS UMR 8253, Institut Necker-Enfants Malades, Paris, France

<sup>3</sup> Plateforme Métabolomique Institut Necker, Structure Fédérative de Recherche SFR Necker, Université Paris Descartes, Paris 75015 France

Running title: Transketolase in *S. aureus* infection

Keywords: Transketolase, *Staphylococcus aureus*, metabolic adaptation, Pentose Phosphate Pathway, sigma B, RpiRc.

Abstract: 142 words; Text: 3235 words.

\* Corresponding authors: Alain Charbit, Mathieu Coureuil

e-mail: [alain.charbit@inserm.fr](mailto:alain.charbit@inserm.fr) ; [mathieu.coureuil@inserm.fr](mailto:mathieu.coureuil@inserm.fr)

Tel: 33 1 – 72 60 65 11 — Fax: 33 1 - 72 60 65 13

*Conflict of interest:* No potential conflict of interest was reported by the authors.

*Funding:* These studies were supported by INSERM, CNRS and Université Paris Descartes Paris Cité Sorbonne. Xin Tan was funded by a scholarship from the China Scholarship Council (n° CSC NO. 201508500097). The funders had no role in study design, data collection and analysis, decision to publish, or preparation of the manuscript.

## Abstract

*Staphylococcus aureus* is a leading cause of both acute and chronic infections in humans. The importance of the pentose phosphate pathway (PPP) during *S. aureus* infection is currently largely unexplored. Here, we focused on one key PPP enzyme, transketolase. We showed that inactivation of the unique gene encoding transketolase activity in *S. aureus* USA300 ( $\Delta tkt$ ) led to drastic metabolomic changes. Using time-lapse video imaging and mice infection, we observed a major defect of the  $\Delta tkt$  strain compared to wild-type strain in early intracellular proliferation and in the ability to colonise kidneys. Transcriptional activity of the two master regulators Sigma B and RpiRc was drastically reduced in the  $\Delta tkt$  mutant during host cells invasion. The concomitant increased RNAlII transcription, suggests that TKT -or a functional PPP- strongly influences the ability of *S. aureus* to proliferate within host cells by modulating key transcriptional regulators.

## Background

*Staphylococcus aureus* is a leading cause of severe skin and soft tissue infections, pneumonia, endocarditis and bone and joint infections [1, 2]. *S. aureus* invade and survive within eukaryotic host cells [3-9]. This is likely to play an important role in chronicity and treatment failures [10-12]. To evade host defences and silently persists within human cells [13, 14], *S. aureus* can dynamically switch phenotypes from a highly aggressive and cytotoxic phenotype to a metabolically inactive phenotype associated with decrease TCA activity [15-18]. Reprogramming of the TCA cycle notably involves the glycolysis/gluconeogenesis and pentose phosphate pathway (PPP) [19].

The contribution of glycolysis/gluconeogenesis to intracellular persistence of *S. aureus* has been recently studied [20-23]. In contrast, the precise role of the PPP is unexplored. The PPP is important for producing nucleotide precursors for DNA synthesis and repair as well as precursors for aromatic amino acids or peptidoglycan synthesis. In addition, the oxidative branch of the PPP contributes to bacterial tolerance to oxidative stress by generating the redox molecule NADPH, H<sup>+</sup>, which is the substrate for other reducing agents such as glutathione. The activity of the PPP has been shown to be frequently increased in Gram-positive pathogens in response to environmental stresses and in infection models [24-26] or in some hospital-acquired isolates [27]. While it has been suggested that the transcriptional regulator RpiRc might control the PPP [28-30], no gene regulation has been yet associated with any change in its activity in *S. aureus*.

Here, we study the role of PPP during the intracellular persistence of *S. aureus* by focusing on one of the key enzyme of this pathway, transketolase (TKT). *tkt* genes are found in a wide range of organisms including bacteria, plants and mammals, underlining the ubiquitous role of this enzyme in biology. We show here that *tkt* inactivation in *S. aureus* USA300 leads to dysregulation of whole cell metabolism. This correlates with impaired proliferation of intracellular staphylococci *in vitro* and kidney colonisation defect in infected mice.

Unexpectedly, we found that the *tkt* defective mutant was unable to regulate the two master regulators of virulence RpirC and SigB, leading to a dramatic increase of RNAlII during intracellular invasion of human cells. Altogether our data suggest a major role of the PPP in the control of *S. aureus* virulence.

## Methods

### Strains, Cells, Culture conditions and Infection.

*S. aureus* USA300-LAC (designated USA300-WT) was provided by the Biodefense and Emerging Infections Research Resources (BEI). The GFP-expressing strain, the  $\Delta tkt$  mutant strain and the complemented strain were constructed and cultured as described in **supplementary methods**. Strains and plasmids used are summarized in **supplementary table S1A**.

*S. aureus* were grown in brain heart infusion (BHI) or chemically defined medium (CDM) supplemented with ribose or fructose or glycerol when it was required [31].

EA.hy926 endothelial cells (ATCC CRL-2922) were grown in DMEM 10 % FBS (5 % CO<sub>2</sub> at 37 °C). When indicated cells were incubated with no glucose DMEM supplemented with glucose, ribose or fructose at a concentration of 25mM. EA.hy926 expressing nuclear mKate2 were transduced with the IncuCyte® NucLight Red Lentivirus.

Cells were infected at a multiplicity of infection (MOI) of 1 for 1 h and washed three times with 100  $\mu$ L of phosphate buffer saline (PBS) containing 300  $\mu$ g/mL gentamicin to remove extracellular bacteria. Cells were then incubated in PBS-gentamicin (50 $\mu$ g/ml). Gentamicin is an antibiotic with a high bactericidal effect on *S. aureus* USA300 (CMI=2  $\mu$ g.mL<sup>-1</sup>) and a very poor penetration inside eukaryotic cells. Its use was necessary to abolish extracellular proliferation.

LAMP-1 colocalization assay in EA.hy926 infected cells is described in the **supplementary methods**.

### Time lapse microscopy

EA.hy926 cells expressing nuclear mKate2 were seeded in ImageLock 96-well plates (Essen BioScience Inc). Cells were infected with WT and  $\Delta tkt$  mutant of the GFP-expressing USA300 strain. Plates were incubated and monitored at 5% CO<sub>2</sub> and 37°C for 24 hours in the fully automated microscope Incucyte® S3 (Essen BioScience). The detailed analysis is further described in the **supplementary methods**.

138

### 139 **Transcriptional analyses**

140 The bacteria were recovered from lysed cells or planktonic overnight culture. Nucleic acids  
141 were released by resuspending bacteria in TE buffer containing lysostaphin. RNAs recovery,  
142 Reverse transcription and PCR were performed as described in the **supplementary**  
143 **methods**.

144

### 145 **Metabolomic analyses**

146 Metabolite profiling of *S. aureus* isolates grown to stationary phase in BHI Broth was  
147 performed by liquid chromatography–mass spectrometry (LC-MS) as described in the  
148 **supplementary methods** [9, 32, 33].

149

### 150 **Transketolase activity assay**

151 TKT activity was analysed on bacteria grown to stationary phase in BHI as described in the  
152 **supplementary methods** [34]. TKT activity was expressed as units per microgram of total  
153 protein. One unit of enzyme was defined as the amount of enzyme that oxidized 1  $\mu$ mol of  
154 NADH per minute.

155

### 156 ***In vivo* infection**

157 Mice were infected intravenously (iv) in the tail vein as described in the **supplementary**  
158 **methods**. For bacterial burden determination, mice were euthanized after 4, 24, 48 and 72  
159 hours. Sequential dilutions of homogenized preparations from spleen and kidney were  
160 spread onto TS agar plates.

161

### 162 **Statistics**

163 Statistical significance was assessed using one-way analysis of variance (ANOVA) with  
164 Dunnett's correction, unpaired two-tail Student's t-test, or Kruskal Wallis test. P values of  
165  $p < 0.05$  were considered to indicate statistical significance.

166

## **Ethics statement**

All experimental procedures involving animals were conducted in accordance with guidelines established by the French and European regulations for the care and use of laboratory animals (Decree 87–848, 2001–464, 2001–486 and 2001–131 and European Directive 2010/63/UE) and approved by the INSERM Ethics Committee (Authorization Number: 75-906).

# Results

## Transketolase inactivation in *S. aureus* USA300

*S. aureus* genomes possess a unique transketolase-encoding gene, designated *tkt*, which is highly conserved within the species. Transketolase (TKT) is an enzyme of the non-oxidative branch of the PPP involved in two main reversible enzymatic reactions: i) Fructose-6-P + Glyceraldehyde-3-P  $\leftrightarrow$  Erythrose-4-P + Xylulose-5-P; and ii) Sedoheptulose-7-P + Glyceraldehyde-3-P  $\leftrightarrow$  Ribose-5-P + Xylulose-5-P (**Supplementary Figure S2A**). Several TKT structures have been solved [35] and allow the modelisation of the *S. aureus* TKT (**Supplementary Figure S1B**). The protein of *S. aureus* is 662 amino acid long and harbours three domains (**Supplementary Figure S1A**). Of note, although ubiquitously expressed in Eukaryotes and Bacteria, *S. aureus* and *Homo sapiens* TKT proteins share only 22.4% amino acid identity (**Supplementary Figure S1C**). We constructed a chromosomal deletion of the *tkt* gene in *S. aureus* strain USA300 ( $\Delta tkt$  strain), and generated a complemented strain (designated Cp-*tkt*) by expressing the wild-type *tkt* allele preceded by its own promoter in the  $\Delta tkt$  strain. Gene inactivation was confirmed by quantification of the transketolase activity (**Supplementary Figure S2**).

The  $\Delta tkt$  mutant showed only a slight growth decrease compared to the WT strain in complete BHI Broth or in Dulbecco's Modified Eagle Medium (DMEM) (**Figure 1A**). In contrast, the  $\Delta tkt$  mutant strain was unable to grow in chemically defined medium [31] supplemented with ribose (which can be converted to Ribose-5-phosphate by ribokinase) (**Supplementary Figure S2C**). In all assays, functional complementation was observed in the Cp-*tkt* strain.

We next performed a whole cell metabolomic analysis on WT and  $\Delta tkt$  strains grown for 24h in BHI Broth (*i.e.*, when identical numbers of cells were recorded) to evaluate the global impact of *tkt* deletion on bacterial metabolism (**Figure 1B and Supplementary Figure S3 and Table S1**). Remarkably, we observed a massive accumulation of ribose-5-phosphate (R5P; 56-fold increase) concomitant with a decrease in ribose content (4-fold decrease) in the  $\Delta tkt$  mutant compared to WT. This accumulation was associated with an increased



amount of metabolites derived from Ribose-5P, such as inosine-5-monophosphate (IMP), xanthosine-5-monophosphate (XMP) and hypoxanthine. We also observed a 2.5-fold decrease in D-sedo-heptulose-7P amount in the  $\Delta tkt$  mutant compared to WT accompanied by a significant decrease in tyrosine, histidine and tryptophan amounts (5, 10 and 12 fold respectively), three aromatic amino-acids produced from the PPP. The glutamate pathway seemed to be significantly more active in the  $\Delta tkt$  strain compared to WT as the amounts of glutamate, proline and ornithine were all increased. The higher amounts of glutamate, possibly fuelling the TCA cycle at the level of  $\alpha$ -ketoglutarate, could be responsible for the increased expression of some TCA cycle metabolites (*i.e.*, fumarate, malate, succinate and  $\alpha$ -ketoglutarate) in the  $\Delta tkt$  strain. Of note, ATP content was not altered in  $\Delta tkt$  strain.

These results demonstrate that deregulation of the PPP by *tkt* inactivation has direct effect on the whole cell metabolism, including aromatic amino acid production, TCA activity and pathways involved in adenine, guanine or peptidoglycan synthesis.

### ***tkt* is essential for intracellular proliferation of *S. aureus***

Intracellular staphylococci exist as two different populations: bacteria that actively proliferate during the first 24 hrs after invasion, leading to their release in extracellular milieu as a consequence of host cell death, and bacteria that do not replicate. These latter staphylococci can persist within host-cell cytoplasm for several days [3-9, 36]. Here we addressed the role of TKT in these two phenotypes in EA.hy926 human endothelial cells by using: i) time lapse-microscopy, to evaluate early intracellular proliferation of *S. aureus* and ii) colony forming units counting, to monitor the survival kinetics of internalized bacteria over a ten days period.

*Time-lapse video microscopy.* EA.hy926 cells expressing mKate2 nuclear fluorescent protein were infected by GFP-expressing bacteria. Gentamicin was used throughout the experiment to eliminate extracellular bacteria and prevent re-infection (see Methods), allowing us to solely focus on the fate of intracellular persistent bacteria. Cell infection was monitored using an IncuCyte® S3 imaging system and images were captured every 30 minutes. Bacterial entry into endothelial cells was similar for WT and  $\Delta tkt$  strains, showing

0.3~0.5 GFP expressing particles recorded per cell (**Figure 2A-B**). Active proliferation of WT *S. aureus* inside EA.hy926 cells was confirmed after 24 hours of infection (**Figure 2A-B and Video 1**) with an average number of GFP expressing particles rising from 0.5 to 2 per cells. At the single cell level, WT *S. aureus* showed active intracellular multiplication, ultimately leading to cell death and bacterial release in the extracellular medium (**Figure 2A-B and Video 1**). Thanks to the permanent presence of gentamicin in the medium bacterial release did not lead to proliferation in the extracellular medium. In contrast, the  $\Delta tkt$  mutant strain showed limited proliferation during the first 24 hours (**Figure 2A-B and Video 2**). Finally, using LAMP-1 colocalization assay (Lysosome-associated membrane proteins 1), we confirmed that the intracellular  $\Delta tkt$  strain growth defect was not due to a decreased phagosomal escape (**Supplementary Figure S4**).

*Long-term intracellular survival.* Using the same infection conditions as for time-lapse experiment, we monitored survival of internalised  $\Delta tkt$  mutant compared to that of the WT strain at three, seven or ten days after infection by CFU counting. The  $\Delta tkt$  strain behaved like the WT strain throughout the infection period, ultimately leading to its complete elimination after 10 days (**Figure 2C**).

Thus, the role of TKT during *S. aureus* host cell infection seems to be essential for bacteria proliferation and restricted to early time points.

### ***tkt* inactivation impairs proliferation of *S. aureus* in the kidney of infected mice.**

The ability of internalized *S. aureus* to readily proliferate inside host cell cytoplasm may be seen as an effective mechanism to avoid host innate immunity, ultimately allowing an increased colonization of the infected site. In this respect, it has been previously shown in the mouse model that after intravenous (IV) injection, although rapidly cleared from the bloodstream, bacteria were able to proliferate in the kidney, leading to abscesses formation within the first days of infection [37].

We monitored the kinetics of *in vivo* proliferation of WT and  $\Delta tkt$  strains in kidneys and spleens of BalbC mice (**Figure 3**) after IV infection with  $5 \times 10^6$  bacteria per mouse. The bacterial burden in kidneys and spleens was quantified by plating CFUs at 4 h, 24 h, 48 h

and 72 h after infection. We observed no significant differences between the bacterial counts in the spleens of mice infected either with WT or the  $\Delta tkt$  mutant. In both cases, a progressive reduction of the bacterial burden was recorded (ranging from  $3.6 \times 10^5$  and  $1.3 \times 10^5$  at 4 h; down to  $2.8 \times 10^3$  and  $0.9 \times 10^3$  at 72 h, for WT and  $\Delta tkt$  respectively). In contrast, in kidneys, whereas the WT strain readily proliferated (from  $6.4 \times 10^4 \pm 5.10^3$  WT *S. aureus* per organ at 4 hrs to  $1.10^8 \pm 6.10^7$  WT *S. aureus* per organ at 72 hrs), multiplication of the  $\Delta tkt$  mutant was severely impaired at all time-points tested, with a ca.  $10^5$ -fold reduction of  $\Delta tkt$  counts at 24h compared to WT counts. This result confirms the importance of TKT -and most likely of the PPP- in bacterial proliferation *in vivo* and especially during the first 24 hours after infection.

#### ***tkt* inactivation is associated with altered *rpiRc* and *sigB* expression.**

*S. aureus* is known to sense its environment and to regulate virulence factors depending on the availability of carbon sources. For example, recent studies have shown that the transcriptional regulator RpiRc could sense metabolic shifts, especially in the PPP, and control expression of RNAIII [29, 30]. RNAIII is a key effector in the quorum-sensing system that regulates the expression of a large number of virulence factors [38]. RpiRc is also linked to the alternative Sigma B factor (SigB) that has pleiotropic roles in gene regulation and is a master regulator of intracellular survival [29, 39, 40].

These data prompted us to follow the expression profile of the master regulator *sigB* and *rpiRc* in the WT and the  $\Delta tkt$  mutant strains during endothelial cells invasion (**Figure 4**). EA.hy296 cells were infected as described above to solely focus on intracellular bacteria. Between day 1 and day 7, *sigB* and *rpiRc* transcription increased in the WT strain (by 4-fold and 3-fold, respectively) (**Figure 4**). In sharp contrast, as early as one day after infection, both genes were significantly down-regulated in the  $\Delta tkt$  mutant strain compared to WT (8-fold and 7-fold decrease for *sigB* and *rpiRc* expression, respectively). Consistent with reports demonstrating inhibition of RNAIII expression by RpiRc and SigB [18], we observed a dramatic increase in the expression of *RNAIII* in the  $\Delta tkt$  mutant strain (**Figure 4**), suggesting that the  $\Delta tkt$  mutant strain is unable to control *rpiRc* and *sigB* expression during intracellular

survival. To further confirm these data, we monitored the expression of two major regulators of SigB activity, RsbU and RsbW [41]. RsbW, which is co-expressed with SigB, is known to sequester and inhibit SigB. RsbU, whose expression is under the control of SigA, is a phosphatase involved in the dephosphorylation of RsbV. In turn, dephosphorylated RsbV (dRsbV) is able to sequester RsbW, allowing the release of active SigB. RsbU is thus considered as an activator of SigB, allowing a fine-tuning of SigB activity.

We found that the transcription of both *rsbW* and *rsbU* genes was down-regulated in the  $\Delta tkt$  mutant during infection of endothelial cells. The down-regulation of *rsbW* is consistent with the down-regulation of its co-expressed gene *sigB* (**Figure 4**). The concomitant down-regulation of *rsbU* suggests a global inhibition of the *sigB* pathway in the  $\Delta tkt$  mutant strain. Finally, we followed expression of *asp23*, a *sigB*-dependent locus [42]. The recorded down-regulation of *asp23* transcription in the  $\Delta tkt$  mutant strain confirmed the inhibition of SigB-dependent transcription. Altogether these transcriptional analyses suggest that the metabolic dysregulation observed in  $\Delta tkt$  strain is sufficient to promote a dramatic reprogramming of the RpiRc and SigB pathways when bacteria invade human cells.

### **The SigB pathway may be controlled by modulating carbon source availability.**

Inside the cytoplasm of host cells the  $\Delta tkt$  mutant is likely to deal simultaneously with PPP blocking and altered levels of carbon-based nutrients compared to the outside compartment. The above results suggested that the PPP might take control of *rpiRc* and *sigB* expression when bacteria invade endothelial cells. We thus hypothesized that PPP-associated carbon sources may possibly influence *rpiRc* and/or *sigB* expression *in vitro*. We therefore grew WT USA300 in CDM supplemented either with glucose (CDM-glucose), ribose (CDM-ribose) or fructose (CDM-fructose) a carbon source possibly fuelling the PPP and quantified by qRT-PCR transcription of *sigB*, *rpiRc*, *rsbU/W* and *asp23* genes. Remarkably, we found that the regulation of the whole *sigB* operon was impacted by the carbon source used in CDM (**Figure 5**). Indeed, expression of *sigB*, *rsbU/W* and *rpiRc* decreased in CDM-fructose or CDM-ribose, compared to CDM-glucose. In contrast, *asp23* expression was only decrease by 2-fold in CDM-fructose and increased by 3-fold in CDM-

ribose, suggesting that in this growth conditions, *asp23* expression might be regulated by other factor than *sigB* (**Figure 5**). Hence, the availability of carbon sources, and especially those related to PPP, may be sensed by the bacteria and affect the regulation of *rpiRc* and *sigB* expression.

## Discussion

Inactivation of the *tkt* gene, encoding the unique transketolase of *S. aureus* USA300, led to a major decreased in early intracellular proliferation and impaired *in vivo* multiplication in a kidney colonization model. Our results suggest that the intracellular proliferation defect of the  $\Delta tkt$  mutant occurs through the inhibition of SigB and RpiRc expression and the concomitant increased RNAIII transcription, thus highlighting a novel connection between the PPP and these master regulators during cell invasion.

Our whole cell metabolomic analysis of planktonic-grown bacteria (**Figure 1, Supplementary Figure S2 and Table S1**) showed a huge increase in R5P intermediates in the  $\Delta tkt$  mutant compared to WT that could be explained by the impaired entry of R5P into glycolysis and a concomitant significant decrease in SH7P relative concentration. In *S. aureus*, ribose is imported by the RbsU transporter and converted to R5P by the RbsD/RbsK pathway. RbsR, the repressor of *rbsUDK* operon, is itself highly regulated by SigB [43]. Interestingly, *S. aureus* grown in CDM-ribose showed a decreased expression of *sigB*. Hence, stress signals that modulate SigB activity are likely to be important effectors for controlling the quantity of RbsR, thereby affecting ribose uptake.

Significant changes in the relative concentrations of TCA cycle intermediates were also recorded in the  $\Delta tkt$  mutant compared to WT (**Supplementary Figure S3**). The TCA cycle plays a central role in maintaining the bacterial metabolic status and has been repeatedly implicated in the regulation of staphylococcal virulence [44, 45]. Hence, changes in TCA cycle activity are likely to induce alterations of the overall metabolome of the bacterium that, in turn, may modulate the activity of metabolite-responsive global regulators such as SigB or RpiR.

RpiRc, a RpiR family-member controlling enzymes involved in sugar catabolism in *S. aureus*, has been shown to repress RNAIII [28], supporting the notion of a direct connection between the PPP and the regulation of *S. aureus* virulence. The expression of SigB has also been shown to play a crucial role during the intracellular life of bacteria possibly by down-regulating pro-inflammatory virulence factors and increasing the expression of factors promoting persistence [18, 40].

We propose (**Figure 6**) that in wild-type *S. aureus*, transketolase activity results in a positive regulation of *rpiRc* and *sigB* transcription and allows the repression of RNAIII. Consequently, repression of toxins production favours intracellular growth. In contrast, in a  $\Delta tkt$  mutant, *rpiRc* and *sigB* transcriptions are not activated, possibly due to metabolic changes (such as R5P accumulation) and RNAIII is not repressed. At this stage, it cannot be excluded that the enzyme itself might also directly affect transcription of these regulators.

TKT inhibitors are currently actively tested in cancer therapy [46] and TKT could constitute an efficient target against tuberculosis [35] and malaria [47]. The present work, highlighting an unprecedentedly reported role of transketolase in *S. aureus* intracellular survival, suggests that modulation of the pentose phosphate pathway activity may also represent an interesting mean to fight *S. aureus* infections.

## Legends

### Figure 1. Phenotypic characterization of the $\Delta tkt$ mutant

**A. Growth of USA300 wild type (WT),  $\Delta tkt$  mutant ( $\Delta tkt$ ) and its complemented derivative (Cp- $tkt$ ).** USA300 WT,  $\Delta tkt$  and Cp- $tkt$  strains were grown in BHI Broth or DMEM for 21 hours at 37°C. Optic densities were measured every-hour from 0 to 8 hours and then at 21 hours. Each panel is a representative experiment.

**B. Metabolomic analysis of the  $\Delta tkt$  mutant strain.** Quantitative metabolomic analysis was performed by ion chromatography and tandem mass spectrometry (IC-MS/MS) after overnight cultures, in BHI Broth, from WT USA300 and  $\Delta tkt$  mutant strains (see **Table S1**). The heatmap, obtained using MetaboAnalyst (<https://www.metaboanalyst.ca>), illustrates the metabolic shift between the two strains.

### Figure 2. Intracellular proliferation and persistence of *S. aureus*.

#### A, B. Intracellular proliferation of USA300 wild type (WT) and $\Delta tkt$ mutant ( $\Delta tkt$ ) strains.

Endothelial EA.Hy926 cells expressing mKate2 nuclear restricted red fluorescent protein were infected with GFP expressing WT and  $\Delta tkt$  strains. One hour after infection, cells were washed several times with gentamicin containing medium to eliminate extracellular bacteria. Gentamicin concentration of 50µg/ml was maintained throughout the experiment. Images were acquired every 30 minutes using Incucyte® S3 live cell imaging system. A. Representative images (see also video S1 and S2). Red: cell nuclei. Green: GFP expressing bacteria. For each line, a white circle was centred on a unique infected cell. Bar = 100µm. B. Quantitative analysis representing the number of green particles divided by the number of red nuclei during the first day after infection. Blue line: WT strain. Red line:  $\Delta tkt$  strain. Black line: non infected cells.

**C. Persistence of intracellular WT and  $\Delta tkt$  strains.** Endothelial EA.Hy926 cells were infected with WT and  $\Delta tkt$  strains as described above. Gentamicin was maintained throughout the experiment. Survival of *S. aureus* was assessed by plating and counting



CFUs three, seven and ten days after infection. Results are shown as mean  $\pm$  SD of triplicate measurements.

### **Figure 3. Proliferation of *S. aureus* in the spleen and the kidney of infected animals.**

Bacterial loads in the spleen and the kidney of BalbC mice infected intravenously with  $5.10^6$  bacteria of the WT and  $\Delta tkt$  strain. Bacterial counts are expressed in CFU/organ (n = 5). Data are shown as mean  $\pm$  SD. Statistical significance was determined using the Kruskal Wallis test (\*  $p < 0.05$ , \*\*  $p < 0.01$ ).

### **Figure 4. Transcription profile of intracellular *S. aureus*.**

Endothelial EA.Hy926 cells were infected with USA300 WT and  $\Delta tkt$  strain as described in figure 2. One, three or seven days after infection cells were washed and collected. RNA from intracellular *S. aureus* were prepared and gene expression of *RNAIII*, *rpiRc*, *sigB*, *rsbU*, *rsbW* and *asp23* was analysed by quantitative RT-PCR. Gene expression level was normalized by that of *gyrA* at days 1, 3 and 7 after infection of EA-hy296 cells. Data are shown as mean  $\pm$  SD of triplicate measurements from two independent experiments. (ANOVA, n.s. : not statistically different; \*  $p < 0.01$ , \*\*  $p < 0.001$ ).

### **Figure 5. Carbon sources influence the transcription profile of the SigB pathway.**

*S. aureus* USA300 WT strain was grown to stationary phase in CDM supplemented with glucose or ribose or fructose and gene expression profile of *rpiRc*, *sigB*, *rsbU*, *rsbW* and *asp23* was analysed by quantitative RT-PCR. Gene expression level was normalized by that of *gyrA*. Data are shown as mean  $\pm$  SD of triplicate measurements from two independent experiments. Statistical significance was assessed in comparison to bacteria grown in CDM glucose (ANOVA, \*  $p < 0.01$ , \*\*  $p < 0.001$ ).

### **Figure 6. Schematic depiction of the impact of TKT inactivation on *sigB* and *rpiRc* regulation.**

SigB dependent regulation of *RNAIII* in  $\Delta tkt$  context.

470

471 **Movie 1: Intracellular proliferation of USA300 wild type strain.** Endothelial EA.Hy926  
 472 cells expressing a nuclear restricted Red Fluorescent Protein were infected with GFP  
 473 expressing wild type strains. One hour after infection cells were washed several times with  
 474 gentamicin containing medium to eliminate extracellular bacteria (see materials and methods  
 475 section). Gentamicin concentration of 50µg/ml was maintained throughout the experiment.  
 476 Images were acquired every 30 minutes using Incucyte® S3 live cell imaging system.

477

478 **Movie 2: Intracellular proliferation of USA300  $\Delta tkt$  mutant strain.** Same protocol as  
 479 above in movie S1.

480

# 481 **Acknowledgements**

482 We are grateful to the Cell imaging core facility of the “Structure Fédérative de Recherche”  
 483 Necker INSERM US24/CNRS UMS3633 for his technical support.

484 The following reagents were provided by the Network on Antimicrobial Resistance in  
 485 *Staphylococcus aureus* (NARSA) for distribution by BEI Resources, NIAID, NIH:  
 486 *Staphylococcus aureus*, Strain USA300-0114, NR-46070; *Escherichia coli* – *Staphylococcus*  
 487 *aureus* Shuttle Vector pNR-46158, Recombinant in *Staphylococcus aureus*, NR-46158.

488

489

490

491

492

493

494

495

496

497

498

## References

1. Otto M. Community-associated MRSA: what makes them special? *Int J Med Microbiol* **2013**; 303:324-30.
2. Thomer L, Schneewind O, Missiakas D. Pathogenesis of *Staphylococcus aureus* Bloodstream Infections. *Annual review of pathology* **2016**; 11:343-64.
3. Proctor RA, von Eiff C, Kahl BC, et al. Small colony variants: a pathogenic form of bacteria that facilitates persistent and recurrent infections. *Nature reviews Microbiology* **2006**; 4:295-305.
4. Tuchscher L, Heitmann V, Hussain M, et al. *Staphylococcus aureus* small-colony variants are adapted phenotypes for intracellular persistence. *The Journal of infectious diseases* **2010**; 202:1031-40.
5. Strobel M, Pfortner H, Tuchscher L, et al. Post-invasion events after infection with *Staphylococcus aureus* are strongly dependent on both the host cell type and the infecting *S. aureus* strain. *Clin Microbiol Infect* **2016**; 22:799-809.
6. Hayes SM, Howlin R, Johnston DA, et al. Intracellular residency of *Staphylococcus aureus* within mast cells in nasal polyps: A novel observation. *The Journal of allergy and clinical immunology* **2015**; 135:1648-51.
7. Hanssen AM, Kindlund B, Stenklev NC, et al. Localization of *Staphylococcus aureus* in tissue from the nasal vestibule in healthy carriers. *BMC microbiology* **2017**; 17:89.
8. Moldovan A, Fraunholz MJ. In or out: phagosomal escape of *Staphylococcus aureus*. *Cellular microbiology* **2018**:e12997.
9. Tan X, Coureuil M, Ramond E, et al. Chronic *Staphylococcus aureus* lung infection correlates with proteogenomic and metabolic adaptations leading to an increased intracellular persistence. *Clin Infect Dis* **2019**.
10. Branger C, Gardye C, Lambert-Zechovsky N. Persistence of *Staphylococcus aureus* strains among cystic fibrosis patients over extended periods of time. *J Med Microbiol* **1996**; 45:294-301.

527 11. Kahl BC, Duebbers A, Lubritz G, et al. Population dynamics of persistent *Staphylococcus*  
528 *aureus* isolated from the airways of cystic fibrosis patients during a 6-year prospective study.  
529 *Journal of clinical microbiology* **2003**; 41:4424-7.

530 12. Fisher RA, Gollan B, Helaine S. Persistent bacterial infections and persister cells. *Nature*  
531 *reviews Microbiology* **2017**; 15:453-64.

532 13. Grosz M, Kolter J, Paprotka K, et al. Cytoplasmic replication of *Staphylococcus aureus*  
533 upon phagosomal escape triggered by phenol-soluble modulins. *Cellular microbiology*  
534 **2014**; 16:451-65.

535 14. Korea CG, Balsamo G, Pezzicoli A, et al. Staphylococcal Esx proteins modulate  
536 apoptosis and release of intracellular *Staphylococcus aureus* during infection in epithelial  
537 cells. *Infection and immunity* **2014**; 82:4144-53.

538 15. Kohler C, von Eiff C, Liebeke M, et al. A defect in menadione biosynthesis induces global  
539 changes in gene expression in *Staphylococcus aureus*. *Journal of bacteriology* **2008**;  
540 190:6351-64.

541 16. Kriegeskorte A, König S, Sander G, et al. Small colony variants of *Staphylococcus*  
542 *aureus* reveal distinct protein profiles. *Proteomics* **2011**; 11:2476-90.

543 17. Kriegeskorte A, Grubmüller S, Huber C, et al. *Staphylococcus aureus* small colony  
544 variants show common metabolic features in central metabolism irrespective of the  
545 underlying auxotrophism. *Frontiers in cellular and infection microbiology* **2014**; 4:141.

546 18. Tuchscher L, Löffler B. *Staphylococcus aureus* dynamically adapts global regulators and  
547 virulence factor expression in the course from acute to chronic infection. *Current genetics*  
548 **2016**; 62:15-7.

549 19. Stincone A, Prigione A, Cramer T, et al. The return of metabolism: biochemistry and  
550 physiology of the pentose phosphate pathway. *Biological reviews of the Cambridge*  
551 *Philosophical Society* **2015**; 90:927-63.

552 20. Harper L, Balasubramanian D, Ohneck EA, et al. *Staphylococcus aureus* Responds to  
553 the Central Metabolite Pyruvate To Regulate Virulence. *mBio* **2018**; 9.

554 21. Purves J, Cockayne A, Moody PC, Morrissey JA. Comparison of the regulation,  
555 metabolic functions, and roles in virulence of the glyceraldehyde-3-phosphate

556 dehydrogenase homologues gapA and gapB in *Staphylococcus aureus*. *Infection and*  
557 *immunity* **2010**; 78:5223-32.

558 22. Vitko NP, Spahich NA, Richardson AR. Glycolytic dependency of high-level nitric oxide  
559 resistance and virulence in *Staphylococcus aureus*. *mBio* **2015**; 6.

560 23. Vitko NP, Grosser MR, Khatri D, Lance TR, Richardson AR. Expanded Glucose Import  
561 Capability Affords *Staphylococcus aureus* Optimized Glycolytic Flux during Infection. *mBio*  
562 **2016**; 7.

563 24. Gardner SG, Marshall DD, Daum RS, Powers R, Somerville GA. Metabolic Mitigation of  
564 *Staphylococcus aureus* Vancomycin Intermediate-Level Susceptibility. *Antimicrobial agents*  
565 *and chemotherapy* **2018**; 62.

566 25. Fleury B, Kelley WL, Lew D, Gotz F, Proctor RA, Vaudaux P. Transcriptomic and  
567 metabolic responses of *Staphylococcus aureus* exposed to supra-physiological temperatures.  
568 *BMC microbiology* **2009**; 9:76.

569 26. Joseph B, Schneiker-Bekel S, Schramm-Gluck A, et al. Comparative genome biology of  
570 a serogroup B carriage and disease strain supports a polygenic nature of meningococcal  
571 virulence. *Journal of bacteriology* **2010**; 192:5363-77.

572 27. Mekonnen SA, Palma Medina LM, Michalik S, et al. Metabolic niche adaptation of  
573 community- and hospital-associated methicillin-resistant *Staphylococcus aureus*. *Journal of*  
574 *proteomics* **2018**.

575 28. Zhu Y, Nandakumar R, Sadykov MR, et al. RpiR homologues may link *Staphylococcus*  
576 *aureus* RNAIII synthesis and pentose phosphate pathway regulation. *Journal of bacteriology*  
577 **2011**; 193:6187-96.

578 29. Gaupp R, Wirf J, Wollenberg B, et al. RpiRc Is a Pleiotropic Effector of Virulence  
579 Determinant Synthesis and Attenuates Pathogenicity in *Staphylococcus aureus*. *Infection*  
580 *and immunity* **2016**; 84:2031-41.

581 30. Balasubramanian D, Ohneck EA, Chapman J, et al. *Staphylococcus aureus* Coordinates  
582 Leukocidin Expression and Pathogenesis by Sensing Metabolic Fluxes via RpiRc. *mBio*  
583 **2016**; 7.

584 31. Hussain M, Hastings JG, White PJ. A chemically defined medium for slime production by  
585 coagulase-negative staphylococci. *J Med Microbiol* **1991**; 34:143-7.

586 32. Mackay GM, Zheng L, van den Broek NJ, Gottlieb E. Analysis of Cell Metabolism Using  
587 LC-MS and Isotope Tracers. *Methods in enzymology* **2015**; 561:171-96.

588 33. Chong J, Soufan O, Li C, et al. MetaboAnalyst 4.0: towards more transparent and  
589 integrative metabolomics analysis. *Nucleic acids research* **2018**; 46:W486-W94.

590 34. Shaw JA, Henard CA, Liu L, Dieckman LM, Vazquez-Torres A, Bourret TJ. Salmonella  
591 enterica serovar Typhimurium has three transketolase enzymes contributing to the pentose  
592 phosphate pathway. *The Journal of biological chemistry* **2018**; 293:11271-82.

593 35. Fullam E, Pojer F, Bergfors T, Jones TA, Cole ST. Structure and function of the  
594 transketolase from *Mycobacterium tuberculosis* and comparison with the human enzyme.  
595 *Open biology* **2012**; 2:110026.

596 36. Rollin G, Tan X, Tros F, et al. Intracellular Survival of *Staphylococcus aureus* in  
597 Endothelial Cells: A Matter of Growth or Persistence. *Frontiers in microbiology* **2017**; 8:1354.

598 37. Cheng AG, Kim HK, Burts ML, Krausz T, Schneewind O, Missiakas DM. Genetic  
599 requirements for *Staphylococcus aureus* abscess formation and persistence in host tissues.  
600 *Faseb J* **2009**; 23:3393-404.

601 38. Boisset S, Geissmann T, Huntzinger E, et al. *Staphylococcus aureus* RNAll coordinately  
602 represses the synthesis of virulence factors and the transcription regulator Rot by an  
603 antisense mechanism. *Genes & development* **2007**; 21:1353-66.

604 39. Mader U, Nicolas P, Depke M, et al. *Staphylococcus aureus* Transcriptome Architecture:  
605 From Laboratory to Infection-Mimicking Conditions. *PLoS genetics* **2016**; 12:e1005962.

606 40. Tuchscher L, Bischoff M, Lattar SM, et al. Sigma Factor SigB Is Crucial to Mediate  
607 *Staphylococcus aureus* Adaptation during Chronic Infections. *PLoS pathogens* **2015**;  
608 11:e1004870.

609 41. Pane-Farre J, Jonas B, Hardwick SW, et al. Role of RsbU in controlling SigB activity in  
610 *Staphylococcus aureus* following alkaline stress. *Journal of bacteriology* **2009**; 191:2561-73.

611 42. Gertz S, Engelmann S, Schmid R, Ohlsen K, Hacker J, Hecker M. Regulation of sigmaB-  
612 dependent transcription of sigB and asp23 in two different Staphylococcus aureus strains.  
613 Molecular & general genetics : MGG **1999**; 261:558-66.

614 43. Lei MG, Lee CY. RbsR Activates Capsule but Represses the rbsUDK Operon in  
615 Staphylococcus aureus. Journal of bacteriology **2015**; 197:3666-75.

616 44. Somerville GA, Cockayne A, Durr M, Peschel A, Otto M, Musser JM. Synthesis and  
617 deformylation of Staphylococcus aureus delta-toxin are linked to tricarboxylic acid cycle  
618 activity. Journal of bacteriology **2003**; 185:6686-94.

619 45. Ding Y, Liu X, Chen F, et al. Metabolic sensor governing bacterial virulence in  
620 Staphylococcus aureus. Proceedings of the National Academy of Sciences of the United  
621 States of America **2014**; 111:E4981-90.

622 46. Xu IM, Lai RK, Lin SH, et al. Transketolase counteracts oxidative stress to drive cancer  
623 development. Proceedings of the National Academy of Sciences of the United States of  
624 America **2016**; 113:E725-34.

625 47. Thota S, Yerra R. Drug Discovery and Development of Antimalarial Agents: Recent  
626 Advances. Current protein & peptide science **2016**; 17:275-9.

627

628

Figure 1

A

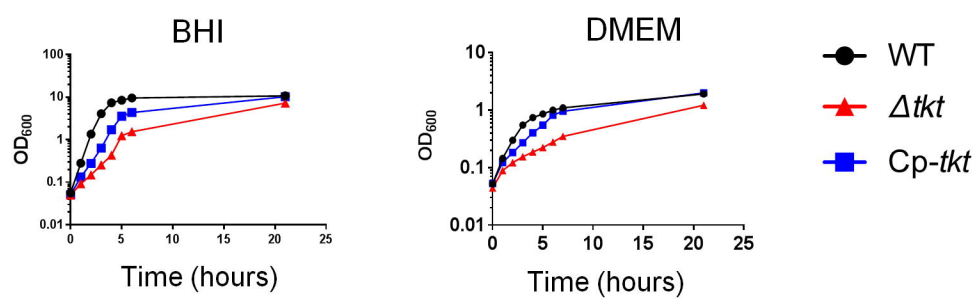

B

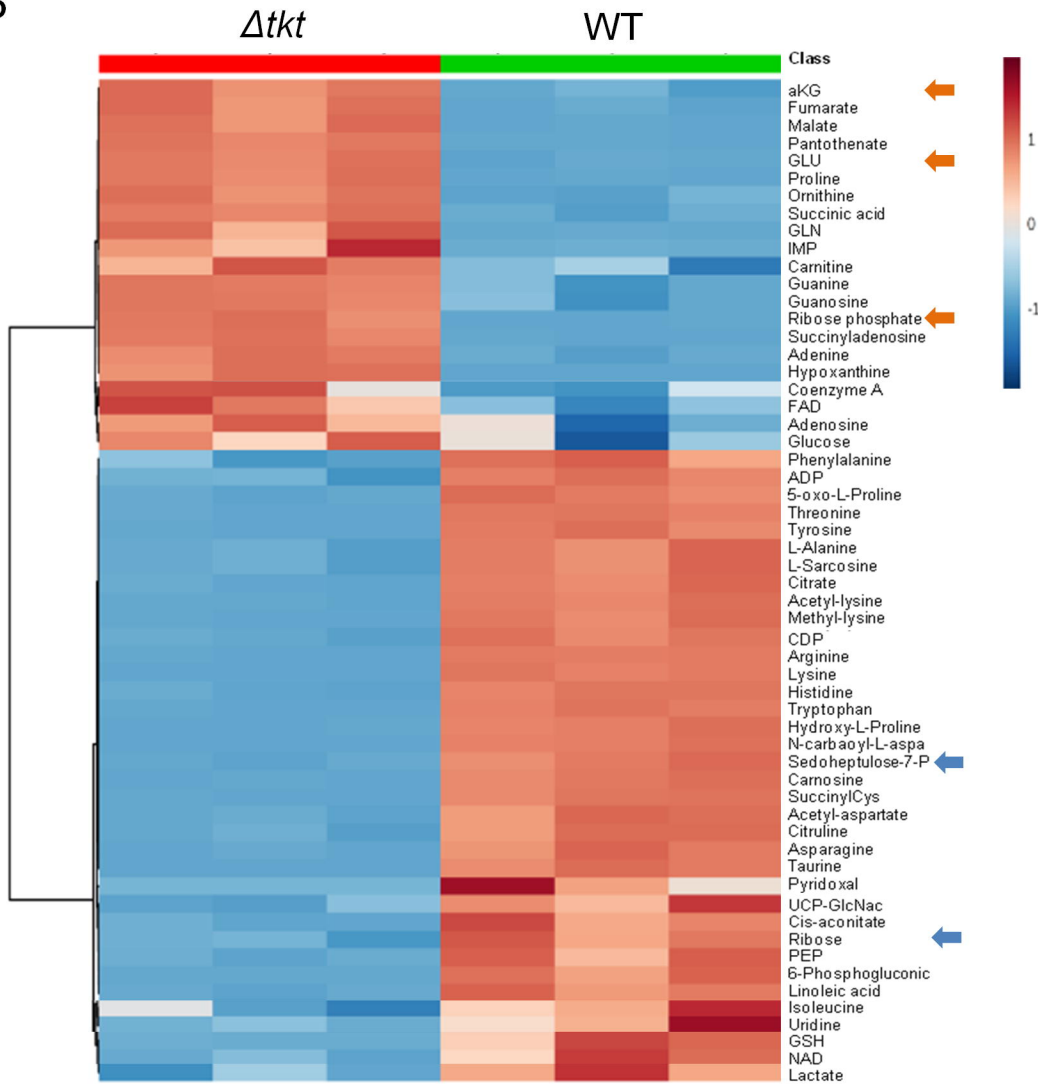



Figure 2

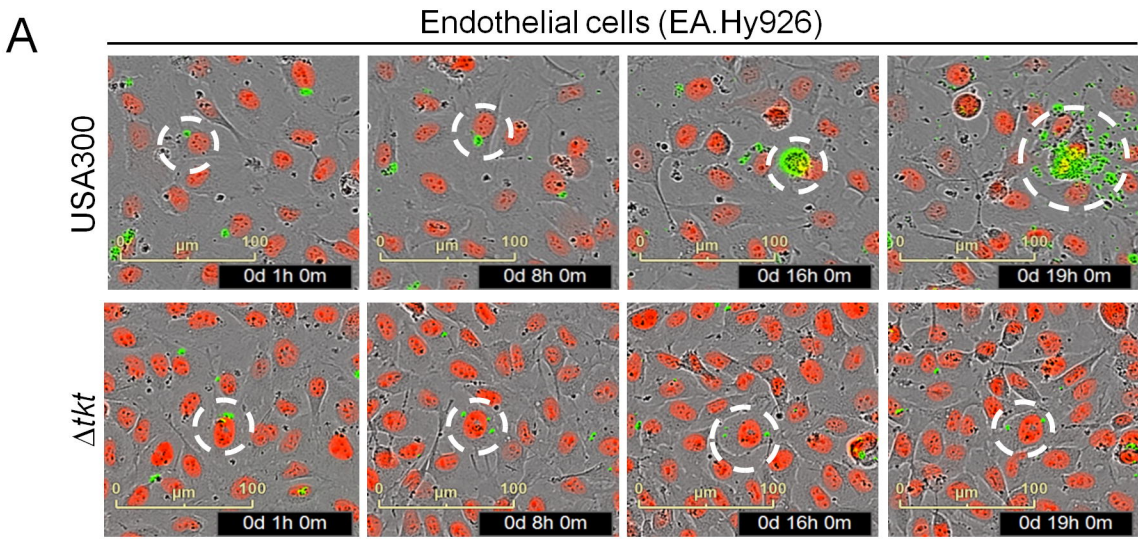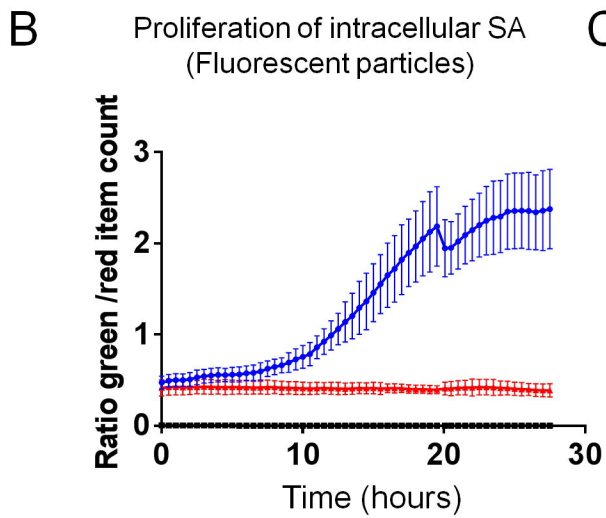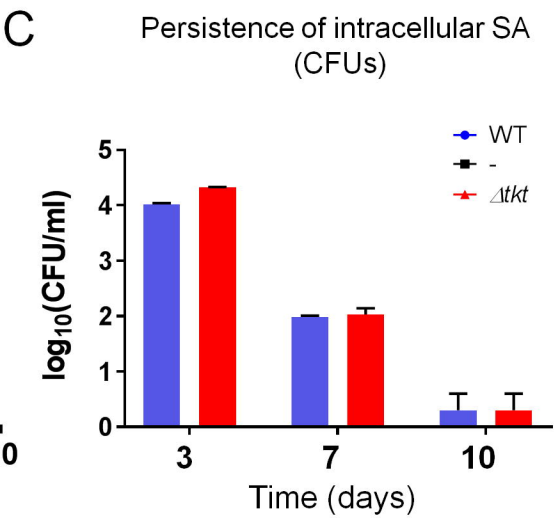

Figure 3

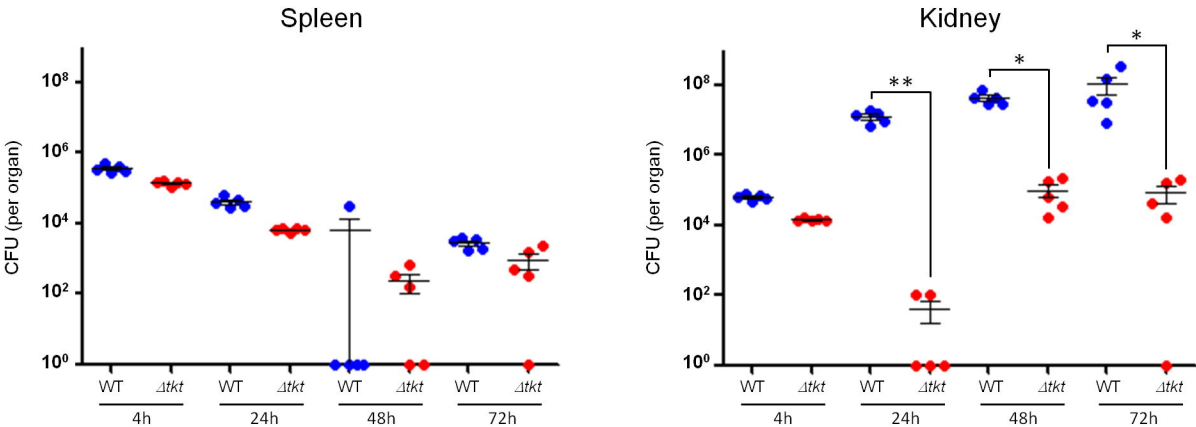

Figure 4

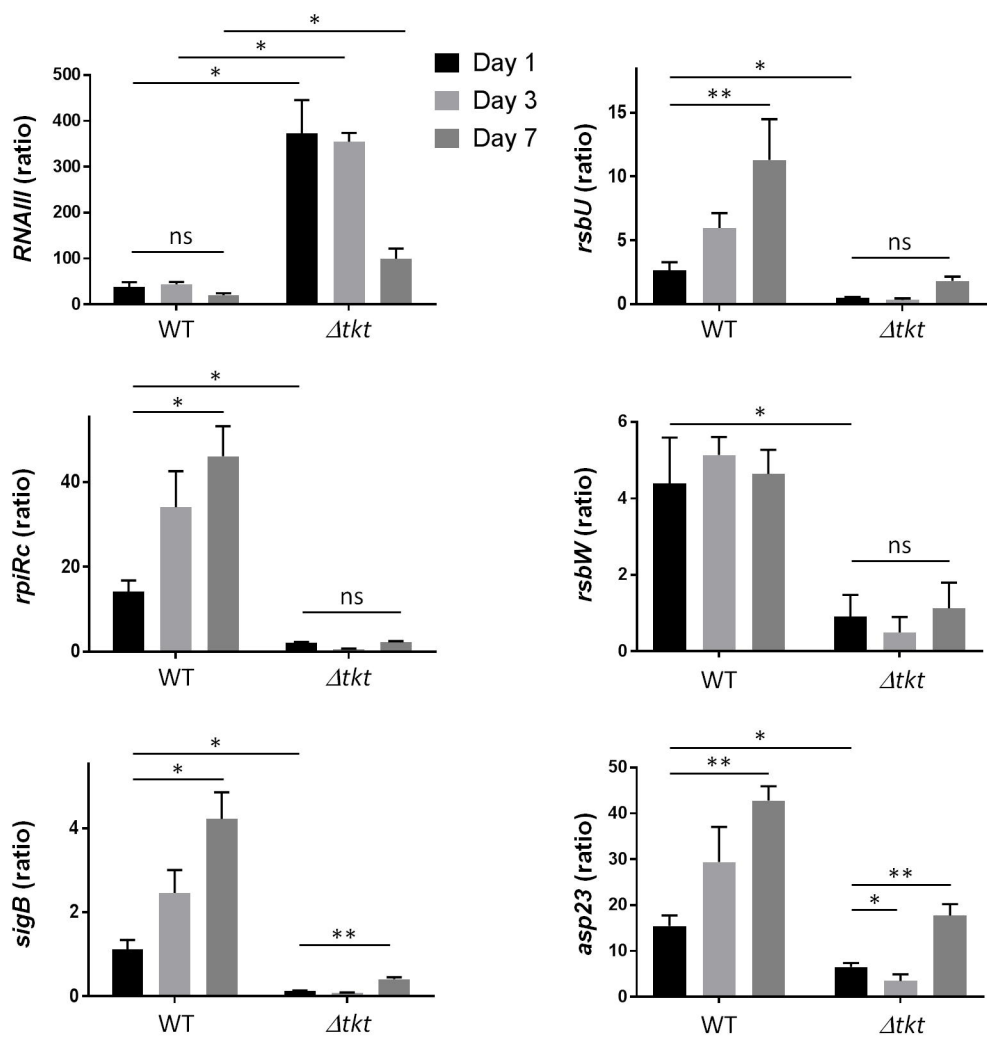

Figure 5

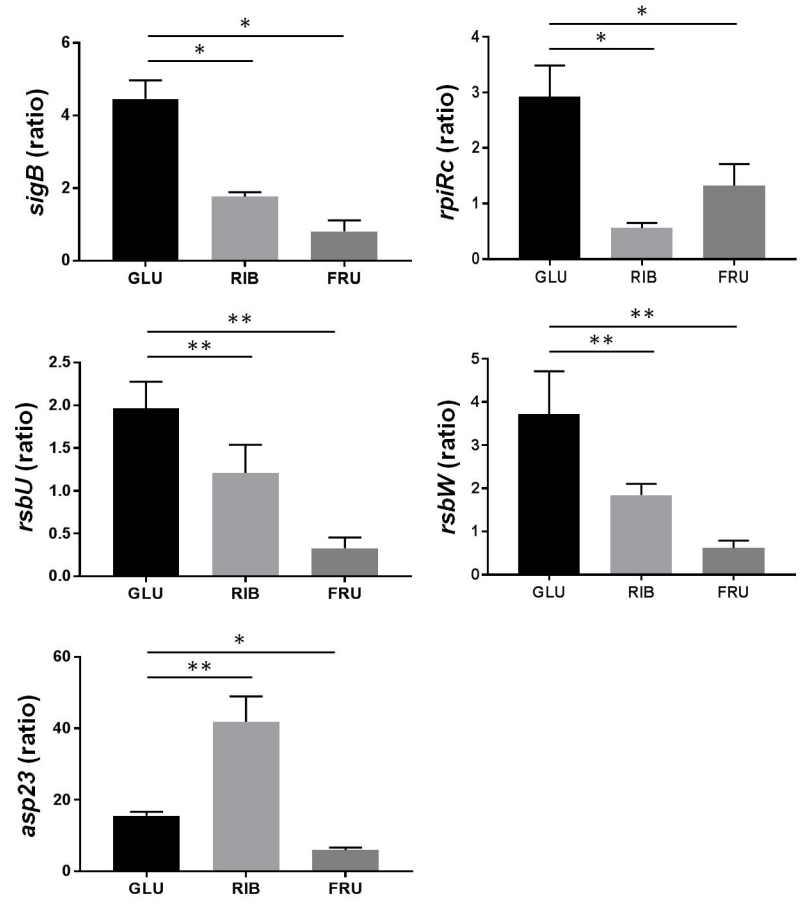

Figure 6

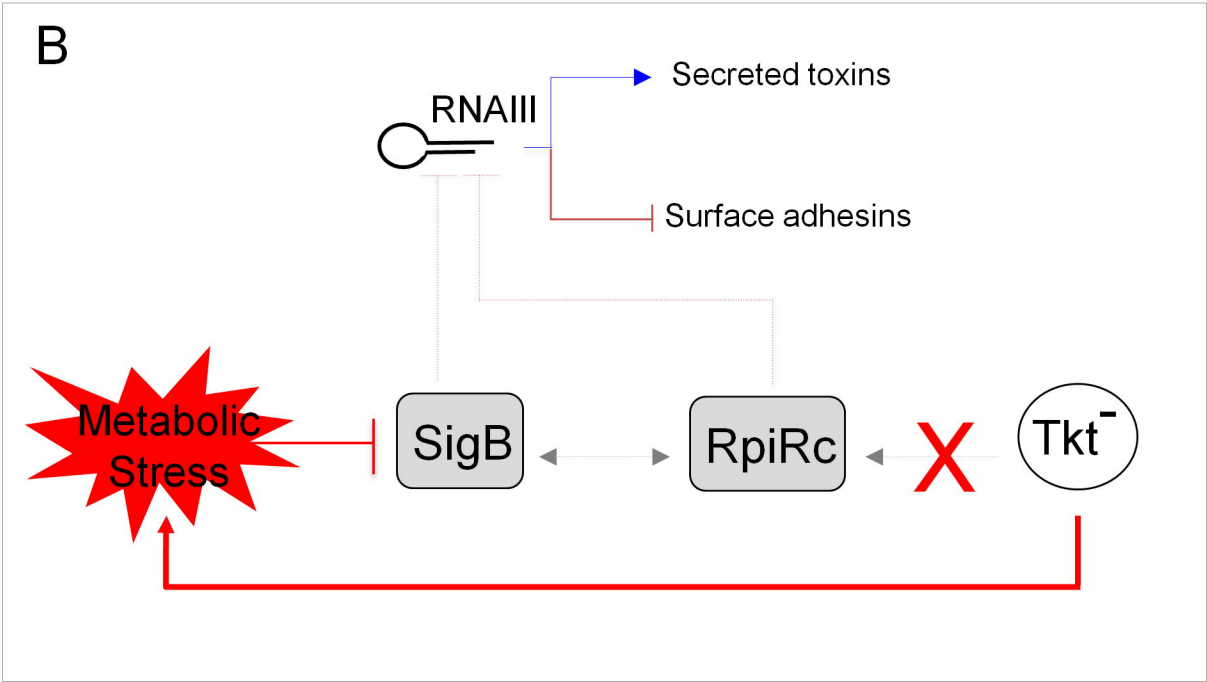

Source: https://www.biorxiv.org/content/biorxiv/early/2019/02/15/538900.full.pdf
